# Supplementary material for: Stabilizing immobilized cellulase by ionic liquids for saccharification of cellulose solutions in 1-butyl-3-methylimidazolium chloride
Source: Royal Society of Chemistry journal article supplement (doi:10.1039/c1gc15294g), 2011-01-01
Supplement: c1gc15294g.pdf [file c1gc15294g.pdf]

## ELECTRONIC SUPPORTING INFORMATION

*Stabilizing immobilized cellulase by ionic liquids for saccharification of cellulose solutions in 1-butyl-3-methylimidazolium chloride.*

*Pedro Lozano\*, Berenice Bernal, Juana M. Bernal, Mathieu Pucheault and Michel Vaultier*

### Deactivation profiles of immobilize cellulase onto Ambelite XAD4 in different ILs at 80 °C

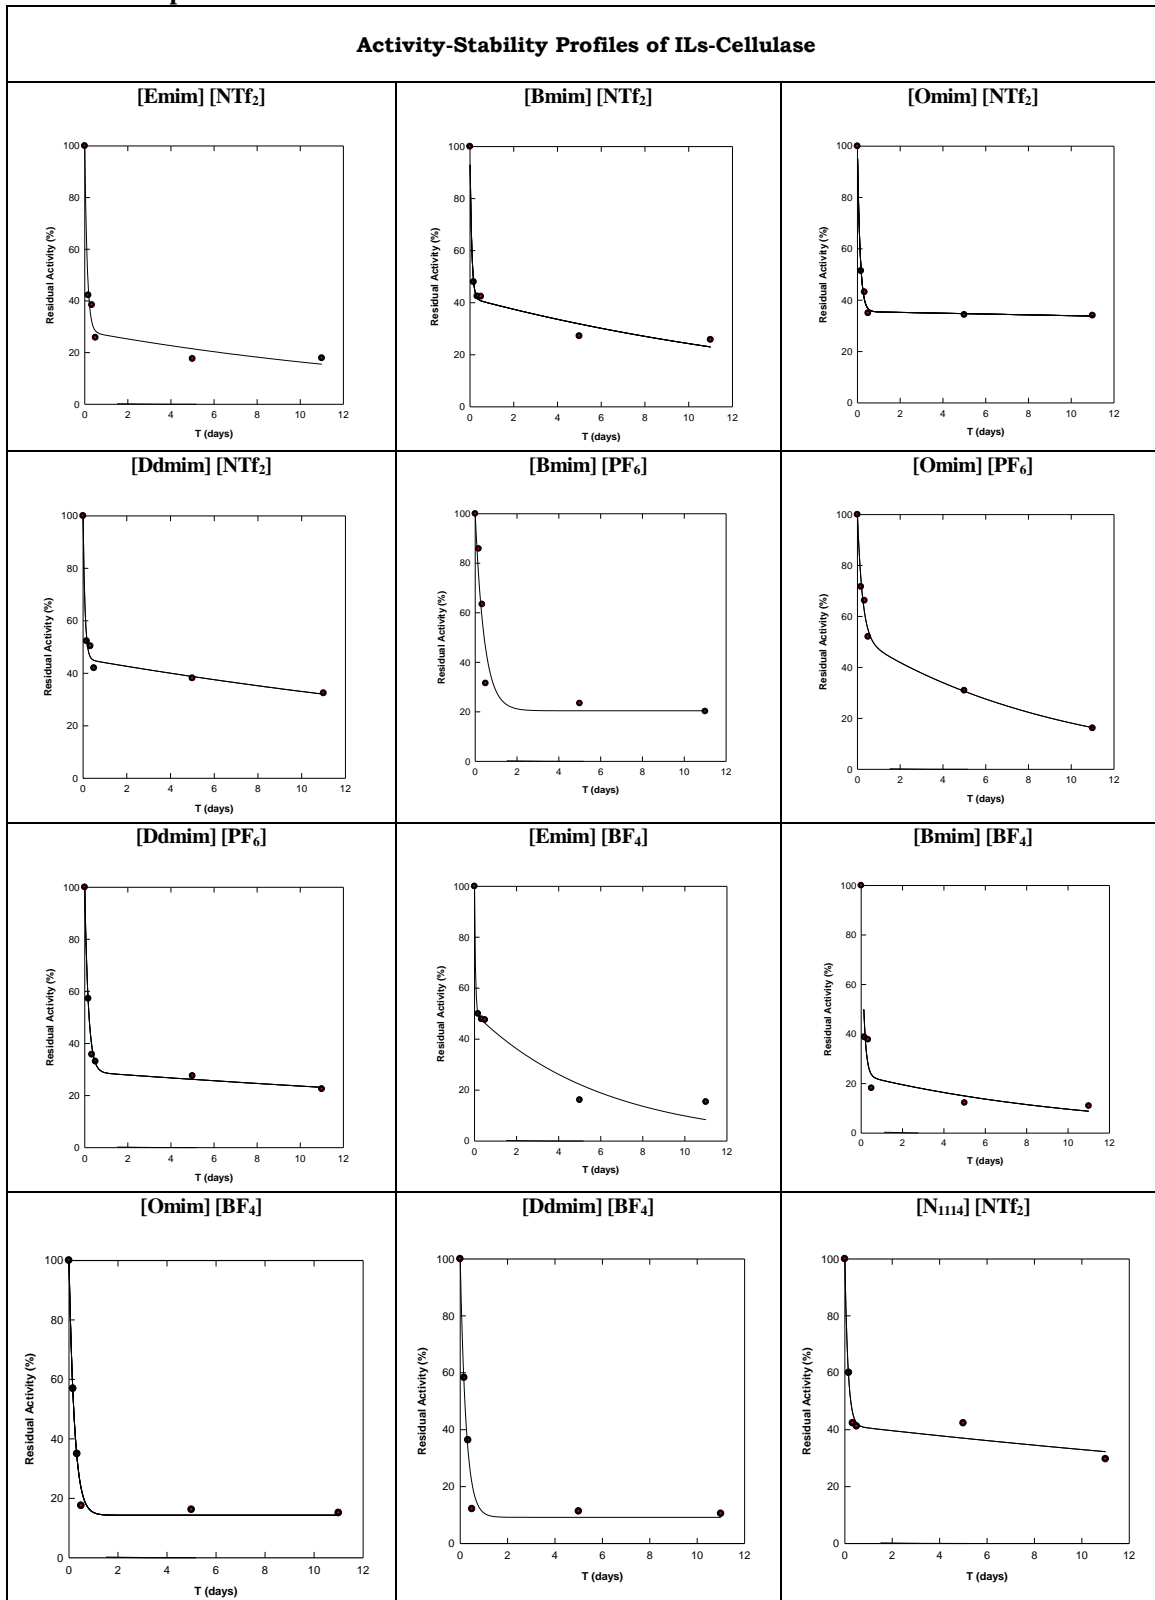

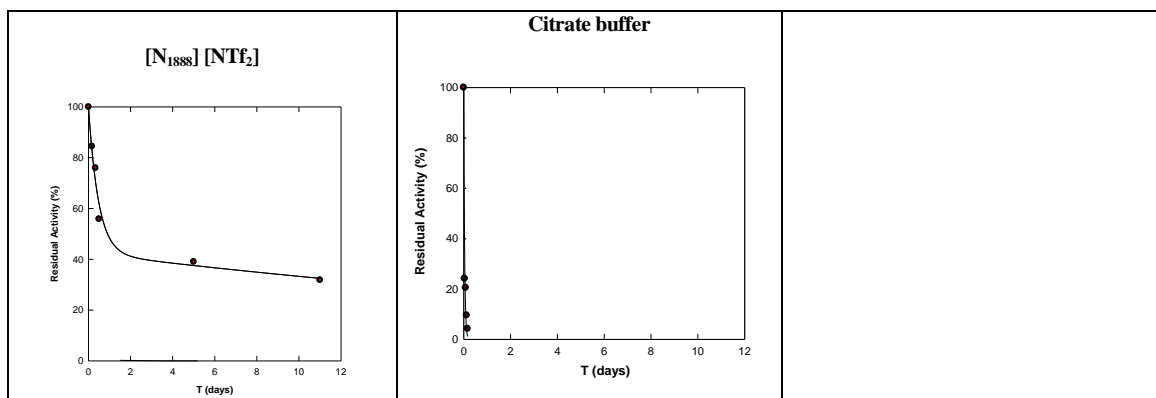

Table 1. Kinetic Parameters of immobilized cellulase deactivation in different IL media at 80 °C. (See Ref. 12a for kinetic equations)

| Ionic liquid                | $t_{1/2}$ (h) | $\alpha_1$             | $\alpha_2$ | $K_1(\text{days}^{-1})$ | $K_2(\text{days}^{-1})$ | Residual Activity at 5 d (%) |
|-----------------------------|---------------|------------------------|------------|-------------------------|-------------------------|------------------------------|
| [Emim] [NTf <sub>2</sub> ]  | 3.24          | 0.2801                 | 0          | 8.6271                  | 0.0543                  | 17.6                         |
| [Bmim] [NTf <sub>2</sub> ]  | 3.48          | 0.4159                 | 0          | 12.8568                 | 0.0542                  | 27.2                         |
| [Omim] [NTf <sub>2</sub> ]  | 4.44          | 0.3555                 | 0          | 7.9469                  | 0.0046                  | 34.3                         |
| [Ddmim] [NTf <sub>2</sub> ] | 5.16          | 0.4535                 | 0          | 11.4512                 | 0.0318                  | 38.2                         |
| [Bmim] [PF <sub>6</sub> ]   | 10.32         | 0.2043                 | 0          | 2.3053                  | $1.99 \cdot 10^{-10}$   | 23.4                         |
| [Omim] [PF <sub>6</sub> ]   | 17.53         | 0.5043                 | 0          | 4.2915                  | 0.1046                  | 30.9                         |
| [Ddmim] [PF <sub>6</sub> ]  | 4.64          | 0.2899                 | 0          | 5.9394                  | 0.0207                  | 27.6                         |
| [Emim] [BF <sub>4</sub> ]   | 3.61          | 0.4979                 | 0          | 22.4047                 | 0.1625                  | 16.1                         |
| [Bmim] [BF <sub>4</sub> ]   | 3.09          | 0.2306                 | 0          | 8.1244                  | 0.0882                  | 17.1                         |
| [Omim] [BF <sub>4</sub> ]   | 4.64          | 0.1432                 | 0          | 4.5197                  | $3.868 \cdot 10^{-10}$  | 19.8                         |
| [Ddmim] [BF <sub>4</sub> ]  | 4.64          | 0.0921                 | 0          | 4.0743                  | $9.44 \cdot 10^{-10}$   | 11.6                         |
| [N1114] [NTf <sub>2</sub> ] | 6.19          | 0.4138                 | 0          | 7.6121                  | 0.0229                  | 42.3                         |
| [N1888] [NTf <sub>2</sub> ] | 21.66         | 0.4187                 | 0          | 2.1004                  | 0.0241                  | 39.1                         |
| Citrate buffer              | 0.37          | $1.2340 \cdot 10^{-7}$ | 0          | 26.5665                 | 250777084               | 0                            |
